# Supplementary material for: Symbiont interactions with non-native hosts limit the formation of new symbioses
Source: PubMed Central journal article supplement (PMC5848548; doi:10.1186/s12862-018-1143-z), 2018-03-12
Supplement: 12862_2018_1143_MOESM1_ESM.pdf [file 12862_2018_1143_MOESM1_ESM.pdf]

| <b>Symbiont species</b>     | <b>Gene</b> | <b>Primer names</b>       | <b>Forward primer (5' to 3')</b> | <b>Reverse primer (5' to 3')</b> |
|-----------------------------|-------------|---------------------------|----------------------------------|----------------------------------|
| <i>Hamiltonella defensa</i> | 16S rRNA    | 10F - T419R               | AGTTTGATCATGGCTCAGATTG           | AAATGGTATTSGCATTATCG             |
| <i>Regiella insecticola</i> | 16S rRNA    | 10F - R443R               | AGTTTGATCATGGCTCAGATTG           | GGTAACGTCAATCGATAAGCA            |
| <i>Serratia symbiotica</i>  | 16S rRNA    | rRNA 16SA1 -16S.S2R       | AGAGTTTGATCMTGGCTCAG             | TTTGAGTTCCCGACTTTATCG            |
| X-type                      | 16S rRNA    | 10F - X420R               | AGTTTGATCATGGCTCAGATTG           | GCAAACTCTTTGCATTGCT              |
| <i>Rickettsia</i> sp.       | 16S rRNA    | rRNA 16SA1 -16S.Ri2R      | AGAGTTTGATCMTGGCTCAG             | TTTGAAAGCAATTCCGAGGT             |
| <i>Spiroplasma</i> sp.      | 16S rRNA    | rRNA 16SA1 -16S.SpR       | AGAGTTTGATCMTGGCTCAG             | ATCATCAACCCTGCCTTTGG             |
| <i>Rickettsiella</i> sp.    | 16S rRNA    | RCL16S-211F - RCL16S-470R | GGGCCTTGCGCTCTAGGT               | TGGGTACCGTCACAGTAATCGA           |

Additional File 1. Diagnostic symbiont species-specific primer sequences
