# Supplementary material for: Symbiont interactions with non-native hosts limit the formation of new symbioses
Source: PubMed Central journal article supplement (PMC5848548; doi:10.1186/s12862-018-1143-z), 2018-03-12
Supplement: 12862_2018_1143_MOESM2_ESM.pdf [file 12862_2018_1143_MOESM2_ESM.pdf]

|                  |                           | Donor (symbiont)          |                        |                |
|------------------|---------------------------|---------------------------|------------------------|----------------|
|                  |                           | <i>Lotus pedunculatus</i> | <i>Medicago sativa</i> | No symbiont    |
| Recipient (host) | <i>Lotus pedunculatus</i> | <b>native</b>             | <b>non-native</b>      | <b>control</b> |
|                  | <i>Medicago sativa</i>    | <b>non-native</b>         | <b>native</b>          | <b>control</b> |
|                  | <i>Ononis spinosa</i>     | <b>non-native</b>         | <b>non-native</b>      | <b>control</b> |

Additional File 2. Production of artificial infection treatments by microinjection of *H. defensa*-containing hemolymph from two donor aphid clones into three symbiont-free recipient aphid clones, named according to their host plant (*L. pedunculatus*, *M. sativa*, or *O. spinosa*), producing two native symbiont strain by host aphid clone associations (“native”) and four non-native associations (“non-native”), plus three control treatments of recipient clones injected with hemolymph from a single *M. sativa* clone that had been cured of *H. defensa* (“control”).
