# Supplementary material for: Symbiont interactions with non-native hosts limit the formation of new symbioses
Source: PubMed Central journal article supplement (PMC5848548; doi:10.1186/s12862-018-1143-z), 2018-03-12
Supplement: 12862_2018_1143_MOESM3_ESM.pdf [file 12862_2018_1143_MOESM3_ESM.pdf]

| Donor aphid clone (symbiont strain) | Recipient aphid clone (biotype) | Native/ Non-native | # aphids injected | # survival to ~7 days | % survival to ~7 days | # survival to reproduction (F1 generation) | % survival that reproduced | # survival to reproduction (F2 generation) | # sampled for infection | # positive infection | % infected |
|-------------------------------------|---------------------------------|--------------------|-------------------|-----------------------|-----------------------|--------------------------------------------|----------------------------|--------------------------------------------|-------------------------|----------------------|------------|
| H218 ( <i>M. sativa</i> )           | c74 ( <i>L. pedunculatus</i> )  | Non-native         | 132               | 51                    | 38.6                  | 7                                          | 13.7                       | 2                                          | 2                       | 1                    | 50.0       |
| H218 ( <i>M. sativa</i> )           | cH218 ( <i>M. sativa</i> )      | Native             | 36                | 26                    | 72.2                  | 12                                         | 46.1                       | 11                                         | 11                      | 5                    | 45.5       |
| H218 ( <i>M. sativa</i> )           | c101 ( <i>O. spinosa</i> )      | Non-native         | 55                | 24                    | 43.6                  | 7                                          | 29.2                       | 1                                          | 1                       | 0                    | 0.00       |
| 74 ( <i>L. pedunculatus</i> )       | c74 ( <i>L. pedunculatus</i> )  | Native             | 40                | 27                    | 67.5                  | 21                                         | 77.8                       | 20                                         | 19                      | 9                    | 47.4       |
| 74 ( <i>L. pedunculatus</i> )       | cH218 ( <i>M. sativa</i> )      | Non-native         | 27                | 22                    | 81.5                  | 16                                         | 72.7                       | 14                                         | 14                      | 6                    | 42.9       |
| 74 ( <i>L. pedunculatus</i> )       | c101 ( <i>O. spinosa</i> )      | Non-native         | 38                | 20                    | 52.6                  | 15                                         | 75.0                       | 8                                          | 8                       | 6                    | 75.0       |
| cH218 (cured)                       | c74 ( <i>L. pedunculatus</i> )  | N/A                | 30                | 23                    | 76.7                  | 19                                         | 82.6                       | 19                                         |                         |                      |            |
| cH218 (cured)                       | cH218 ( <i>M. sativa</i> )      | N/A                | 32                | 27                    | 84.4                  | 23                                         | 85.2                       | 23                                         |                         |                      |            |
| cH218 (cured)                       | c101 ( <i>O. spinosa</i> )      | N/A                | 39                | 22                    | 56.4                  | 20                                         | 90.9                       | 20                                         |                         |                      |            |

Additional File 3. Survival, reproduction, and establishment of *H. defensa* strains in different host aphid clones. Aphids that have been cured of *H. defensa* have a "c" prior to the clone number.
