# Supplementary material for: Symbiont interactions with non-native hosts limit the formation of new symbioses
Source: PubMed Central journal article supplement (PMC5848548; doi:10.1186/s12862-018-1143-z), 2018-03-12
Supplement: 12862_2018_1143_MOESM4_ESM.pdf [file 12862_2018_1143_MOESM4_ESM.pdf]

| Donor aphid clone<br>(symbiont strain) | Recipient aphid clone<br>(biotype) | # aphids<br>injected | # survival to<br>~7 days | %<br>survival<br>to ~7<br>days | # survival to<br>reproduction<br>(F1<br>generation) | % survival<br>that<br>reproduced | # survival to<br>reproduction<br>(F2<br>generation) | # sampled<br>for<br>infection | # positive<br>infection | %<br>infected |
|----------------------------------------|------------------------------------|----------------------|--------------------------|--------------------------------|-----------------------------------------------------|----------------------------------|-----------------------------------------------------|-------------------------------|-------------------------|---------------|
| 74 ( <i>L. pedunculatus</i> )          | c74 ( <i>L. pedunculatus</i> )     | 35                   | 21                       | 60.0                           | 19                                                  | 90.5                             | 19                                                  | 19                            | 9                       | 47.4          |
| 74 ( <i>L. pedunculatus</i> )          | c132 ( <i>L. pedunculatus</i> )    | 30                   | 22                       | 73.3                           | 22                                                  | 100                              | 22                                                  | 20                            | 14                      | 70.0          |
| 74 ( <i>L. pedunculatus</i> )          | 672 ( <i>L. pedunculatus</i> )     | 35                   | 24                       | 68.6                           | 21                                                  | 87.5                             | 21                                                  | 20                            | 20                      | 100           |
| 74 ( <i>L. pedunculatus</i> )          | 663 ( <i>L. corniculatus</i> )     | 33                   | 26                       | 78.8                           | 23                                                  | 88.5                             | 23                                                  | 20                            | 9                       | 45.0          |
| 74 ( <i>L. pedunculatus</i> )          | 664 ( <i>L. corniculatus</i> )     | 35                   | 29                       | 82.9                           | 25                                                  | 86.2                             | 25                                                  | 20                            | 8                       | 40.0          |
| 74 ( <i>L. pedunculatus</i> )          | 451 ( <i>L. corniculatus</i> )     | 40                   | 26                       | 65.0                           | 23                                                  | 88.5                             | 23                                                  | 20                            | 10                      | 50.0          |
| c74 (cured)                            | c74 ( <i>L. pedunculatus</i> )     | 29                   | 23                       | 79.3                           | 22                                                  | 95.7                             |                                                     |                               |                         |               |
| 663 (symbiont-free)                    | 663 ( <i>L. corniculatus</i> )     | 33                   | 26                       | 78.8                           | 25                                                  | 96.2                             |                                                     |                               |                         |               |

Additional File 4. Survival, reproduction and establishment of a *Lotus pedunculatus* strain of *H. defensa* in aphid clones from two different biotypes. All injected recipient clones were either naturally free of secondary symbionts or were selectively cured of their secondary symbionts ("c" prior to the clone number).
